# Supplementary material for: Immunopathological Inflammation in the Evolution of Mucositis and Peri-Implantitis
Source: MDPI journal article supplement (doi:10.3390/ijms232415797), 2022-12-13
Supplement: s1 [file s1]

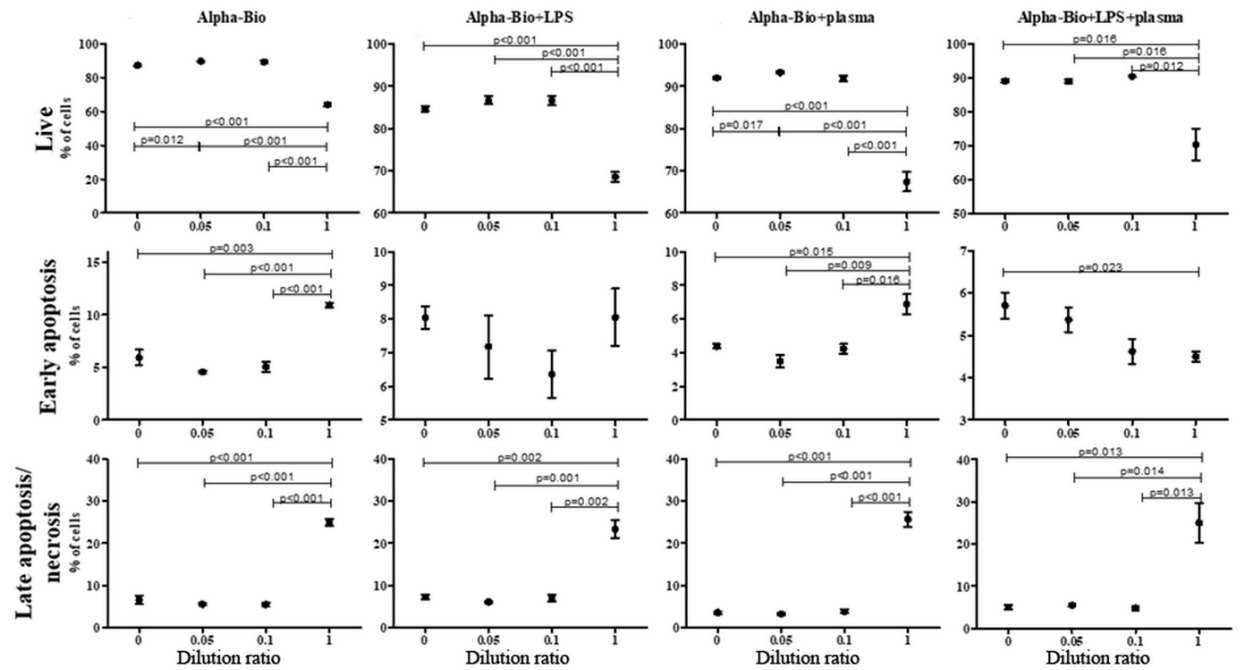

**Supplementary Figure S1.** Viability of THP-1 cells after 24 h of incubation with NSMP from the Alpha-Bio system. LPS, incubation with NSMP and PBS as a co-stimulator; Plasma, incubation with NSMP and blood plasma from healthy donors as a co-stimulator; LPS+Plasma, incubation with NSMP and a combination of LPS and blood plasma from healthy donors as co-stimulators.

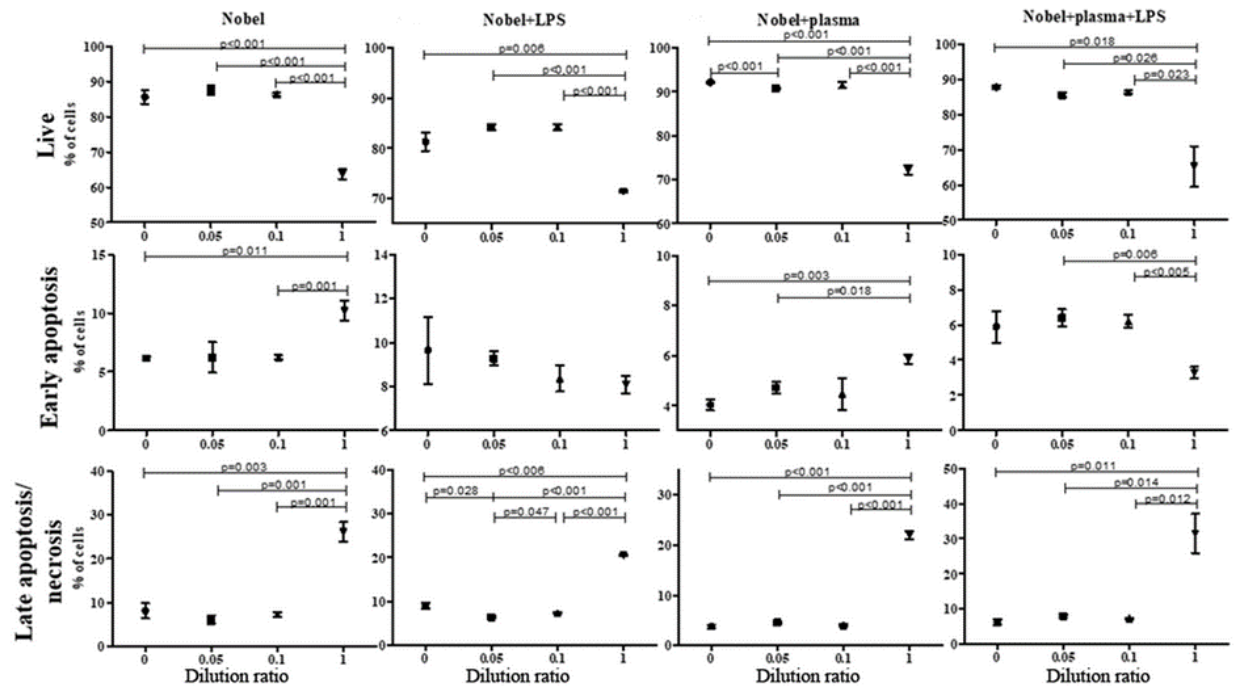

**Supplementary Figure S2.** Viability of THP-1 cells after 24 h of incubation with NSMP from the Alpha-Bio system. LPS, incubation with NSMP and PBS as a co-stimulator; Plasma, incubation with NSMP and blood plasma from healthy donors as a co-stimulator; LPS+Plasma, incubation with NSMP and a combination of LPS and blood plasma from healthy donors as co-stimulators.

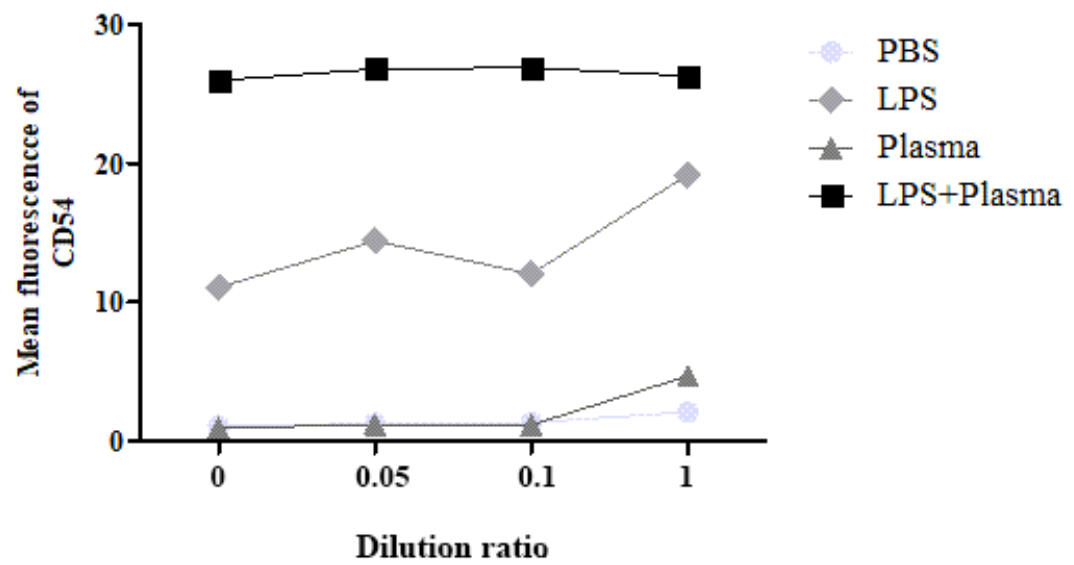

**Supplementary Figure S3.** Results of a two-factor statistical analysis of the effect of Nobel Replace NSMP on THP-1 activation.

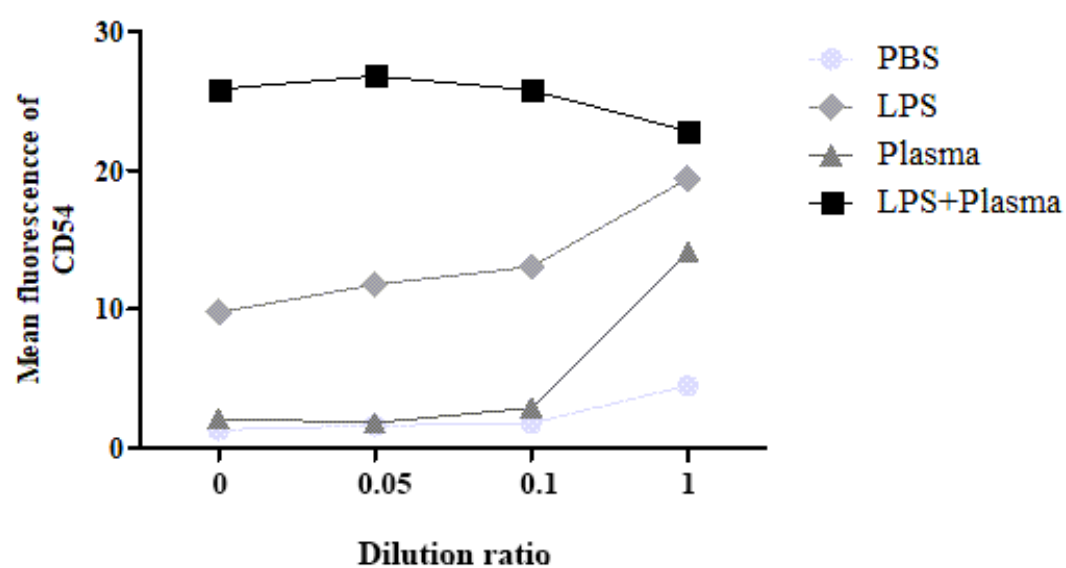

**Supplementary Figure S4.** Results of a two-factor statistical analysis of the effect of Alpha-Bio NSMP on THP-1 activation.

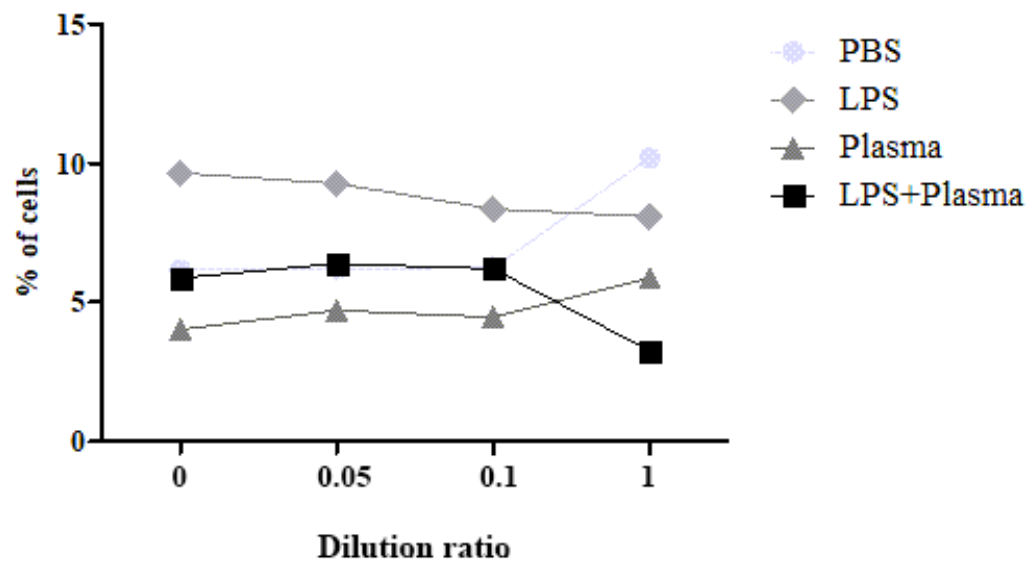

**Supplementary Figure S5.** Results of a two-factor statistical analysis of the effect of Nobel Replace NSMP on THP-1 early apoptosis.

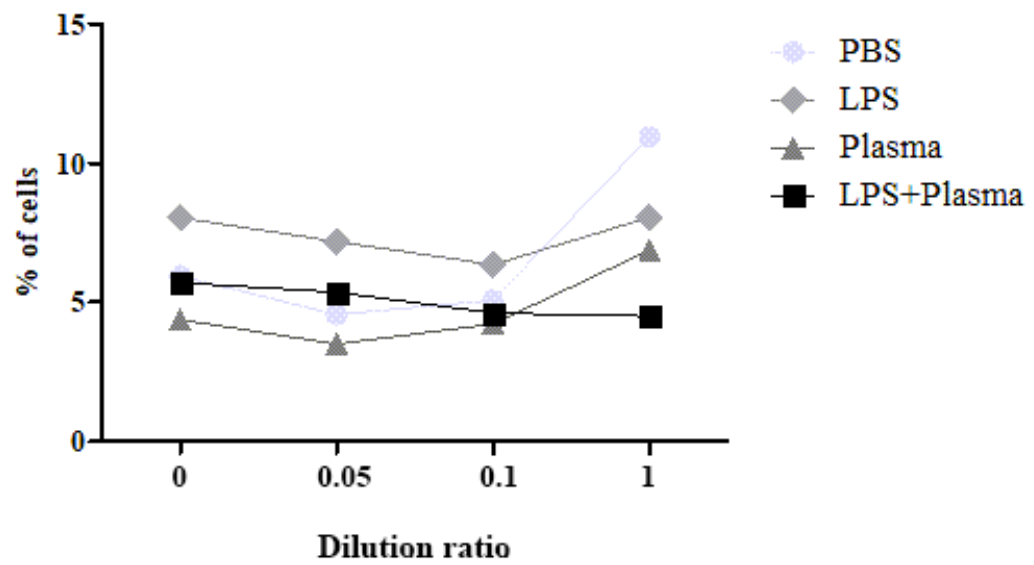

**Supplementary Figure S6.** Results of a two-factor statistical analysis of the effect of Alpha-Bio NSMP on THP-1 early apoptosis.

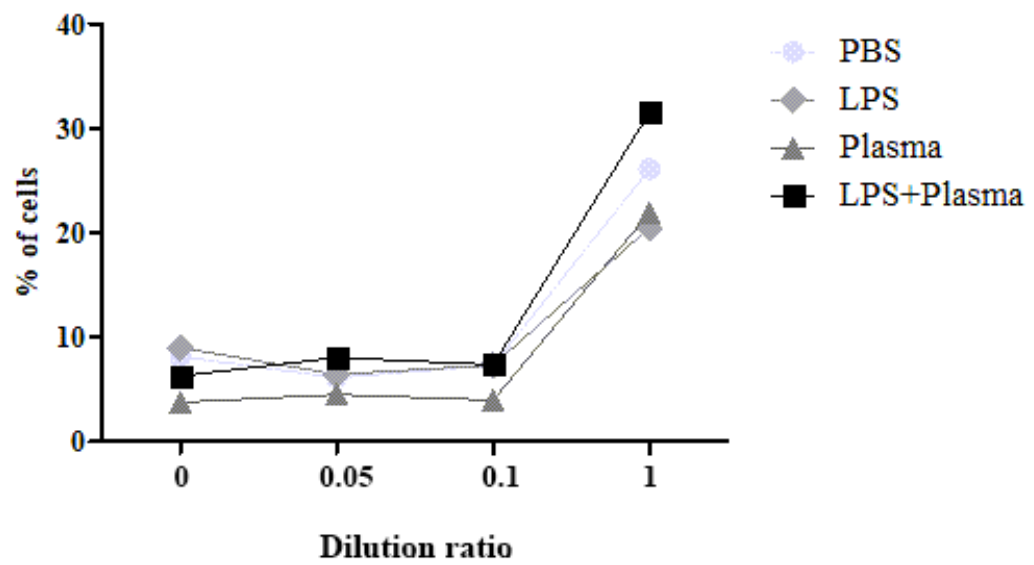

**Supplementary Figure S7.** Results of a two-factor statistical analysis of the effect of Nobel Replace NSMP on THP-1 late apoptosis.

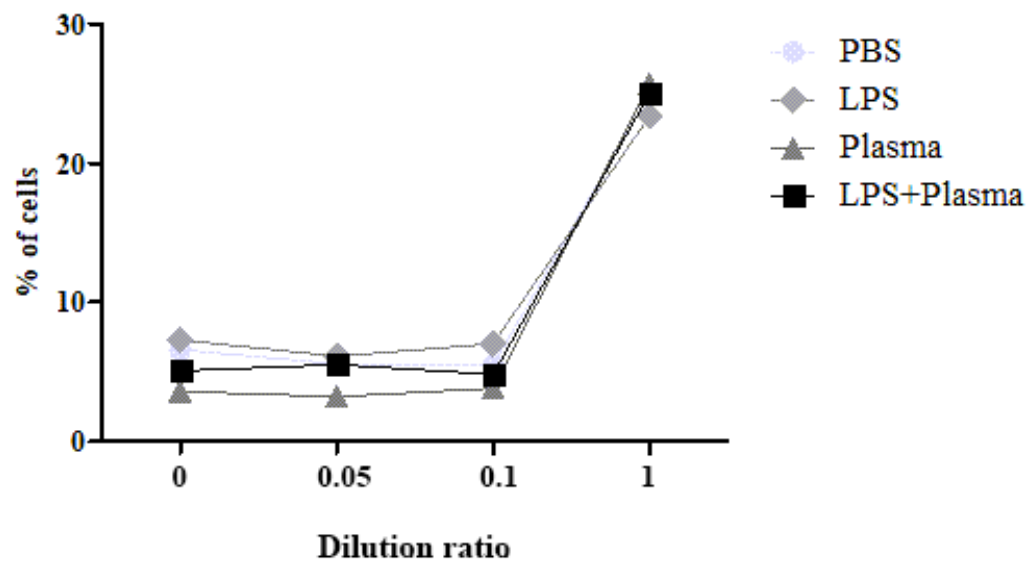

**Supplementary Figure S8.** Results of a two-factor statistical analysis of the effect of Alpha-Bio NSMP on THP-1 late apoptosis.



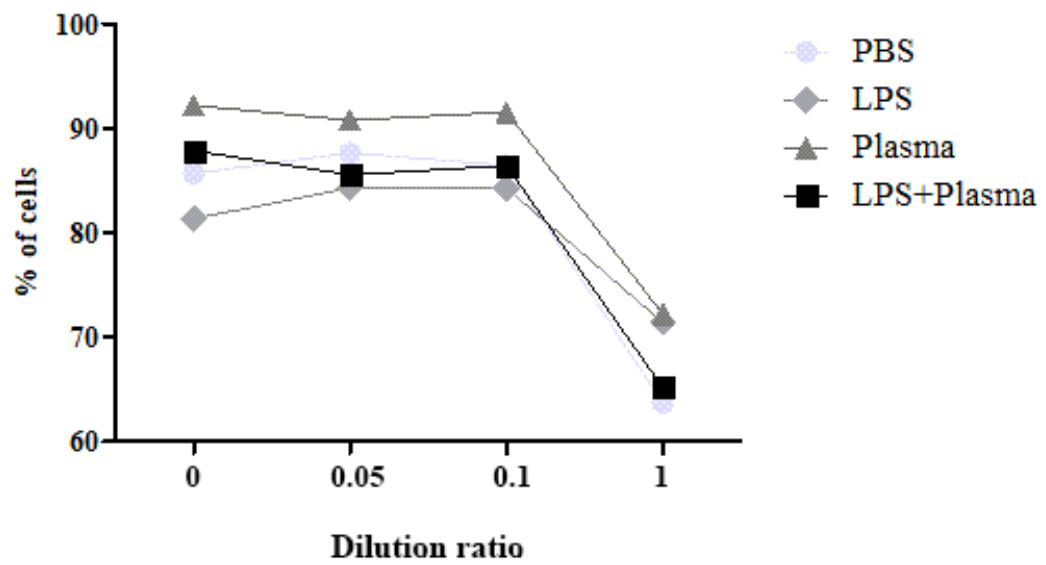

**Supplementary Figure S9.** Results of a two-factor statistical analysis of the effect of Nobel Replace NSMP on THP-1 viability.

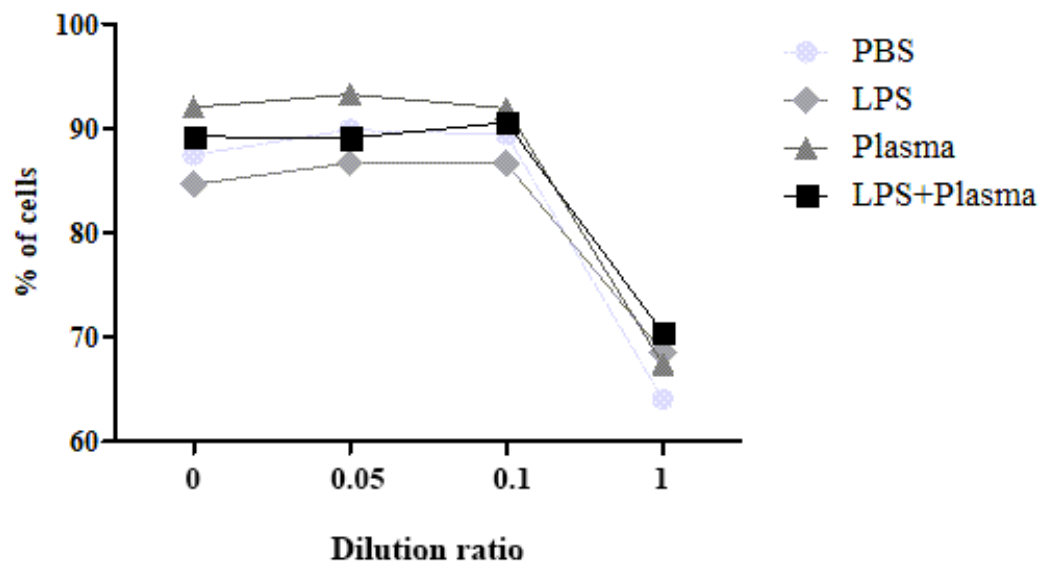

**Supplementary Figure S10.** Results of a two-factor statistical analysis of the effect of Alpha-Bio NSMP on THP-1 viability.
